# Supplementary material for: A core–shell nanohollow-γ-Fe2O3@graphene hybrid prepared through the Kirkendall process as a high performance anode material for lithium ion batteries
Source: Royal Society of Chemistry journal article supplement (doi:10.1039/c5cc01195g), 2015-01-01
Supplement: c5cc01195g1.pdf [file c5cc01195g1.pdf]

**Electronic Supplementary Information for**  
**Core-Shell Nano-hollow  $\gamma$ -Fe<sub>2</sub>O<sub>3</sub>@Graphene Hybrid Prepared through the Kirkendall**  
**Process as High Performance Anode Materials for Lithium Ion Battery**

Jiangtao Hu‡, Jiaxin Zheng‡, Leilei Tian, Yandong Duan, Lingpiao Lin, Suihan Cui, Hao Peng, Tongchao Liu, Hua Guo, Xinwei Wang and Feng Pan\*

School of Advanced Materials, Peking University, Peking University Shenzhen Graduate School, Shenzhen 518055, China

\* Corresponding author: [panfeng@pkusz.edu.cn](mailto:panfeng@pkusz.edu.cn)

‡ J. Hu and J. Zheng contributed equally to this work.

**Materials and methods**

**Synthesis nano-hollow  $\gamma$ -Fe<sub>2</sub>O<sub>3</sub>@Graphene and  $\alpha$ -Fe<sub>2</sub>O<sub>3</sub>:** the commercial Prussian Blue (0.5 g) and glucose (0.15 g) were dispersed in distilled water and ethanol, and dispersed further by grinding in mortar. Then the mixture was heated to 80 °C for 8h in air dry oven. Hereafter, the obtained mixture was calcined at 650 °C in argon atmosphere. The carbon-coated iron nanoparticles were produced, during which the PB was decomposed from 237 °C as shown in Fig. S3a while Fe nano-metals was produced by reduction of glucose decomposition, during which the layer FeC<sub>x</sub> is generated at the 650 °C, then to separate into layers of graphene and Fe nano-metals when cooling down to the room temperature, so that the graphene layer was generated to coat on the nano Fe particles shown in Fig. 1 (I-II). After the furnace cooling naturally to room temperature and then exposing in air, the nano Fe particles was oxidized by O<sub>2</sub> by a spontaneous combustion to transfer into nano-hollow  $\gamma$ -Fe<sub>2</sub>O<sub>3</sub>

shown in Fig. 1 (III). For comparisons, the above mixture of Prussian Blue and glucose was calcined at 650°C in air for 6 hours to form  $\alpha$ -Fe<sub>2</sub>O<sub>3</sub>.

The mechanism of the nano-hollow  $\gamma$ -Fe<sub>2</sub>O<sub>3</sub> prepared from the nano-Fe nano-crystals at the room temperature should be belonged to a type of nanoscale Kirkendall based-process coupled with interfacial oxidation chemical reactions in air by the Cabrera and Mott effect.<sup>1</sup> Cabrera and Mott's lower-temperature oxidation effect occurs initially on the oxide surface on which oxygen atoms are adsorbed, and electrons can pass rapidly through the oxide by tunneling to establish an equilibrium between the nano-Fe metal's surfaces and adsorbed oxygen to create an electronic field in the thin oxide layer, which can pull metal ions through the oxide film (shown in Fig. 1III). Then, small Kirkendall voids will generate when Fe atoms in the inside-shell nanoparticles migrate into the  $\gamma$ -Fe<sub>2</sub>O<sub>3</sub> surface layer and then contribute to the formation of a new  $\gamma$ -Fe<sub>2</sub>O<sub>3</sub> layer. The second stage is dominated by Fe atomic surface diffusion from the nano-Fe core material along the pore surface to the reaction front as the dominant material transport process because of a much lower activation energy of surface diffusion than bulk diffusion. After all Fe atoms are consumed to react with oxygen ion absorbed on the  $\gamma$ -Fe<sub>2</sub>O<sub>3</sub> surface, nano-hollow  $\gamma$ -Fe<sub>2</sub>O<sub>3</sub> can be formed as a result of the vacancy clustering in the core as shown in Fig. 1 (III).

**Structure and Morphology Characterization:** the crystallographic structures of the samples were characterized with X-ray diffraction (XRD, Bruker D8 Advance diffractometer using Cu K $\alpha$ ). XPS analyses were performed using ESCALAB 250XL. The scanning electron microscopy (SEM) images were measured on ZEISS Supra 55. The micro-structure of  $\gamma$ -Fe<sub>2</sub>O<sub>3</sub>@graphene was studied by using transmission electron microscopy (FEI Tecnai G2

F20 S-Twin). Thermogravimetry analysis(TGA) data of  $\gamma$ -Fe<sub>2</sub>O<sub>3</sub>@ graphene was collected on a TGA/DSC1 system at a heating rate of 10°C/min under oxygen flow. Raman spectrum was recorded by iHR 320. The surface area was determined by nitrogen adsorption/desorption using the Brunauer–Emmett–Teller method (BET, Micromeritics ASAP 2020 HD88).

***Electrochemical Performance Test*** : the working electrode was prepared by coating a slurry of active material (60 wt %), carbon black (30 wt %), and poly(vinylidene fluoride) binder (10 wt %) dissolved in N-methylpyrrolidine onto a copper foil, and then drying in vacuum at 110°C for 12 h. The 2032 coin-type cells were finally assembled in an argon-filled glovebox , using pure lithium foil as the counter electrode and reference electrode, cell grand membrane as the separator, and 1 M LiPF<sub>6</sub> in a mixture of EC, DEC and DMC with a volume ratio of 1:1:1 as the electrolyte. Before the electrochemical measurement, the prepared cells were shelved for 6h. Galvanostatic discharge/charge tests were performed using a NEWARE battery cycler in the voltage range of 0.01-3.0 V (vs. Li<sup>+</sup>/Li) at room temperature. The cyclic voltammetry (CV) results were recorded by a CHI 604E. The electrochemical impedance measurements were carried out on the batteries which were charged and discharged for different cycles. All the electrochemical measurements were performed at room temperature.

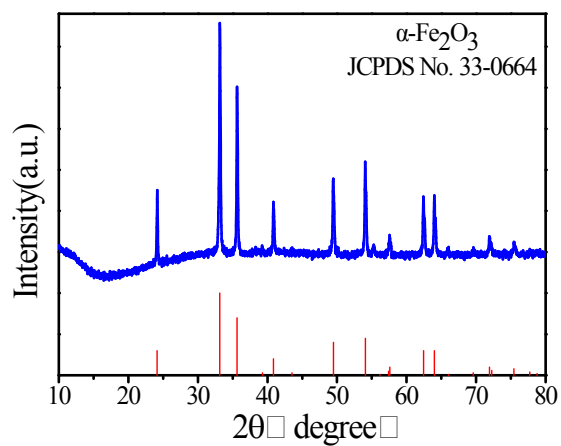

**Figure S1.** XRD pattern of the prepared  $\alpha$ -Fe<sub>2</sub>O<sub>3</sub>.

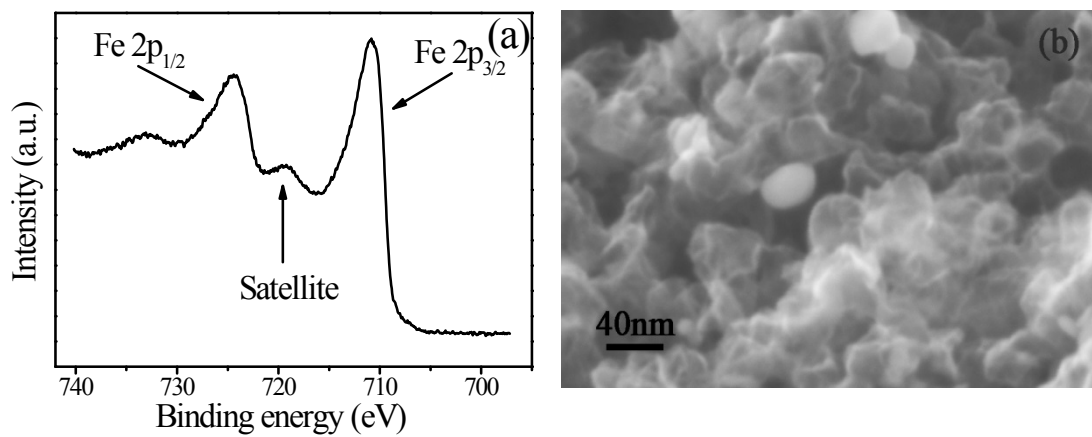

**Figure S2.** X-ray photoelectron spectroscopy (XPS) spectra: (a) Fe 2p spectra, (b) the SEM image of the shell of the graphene left from nano-hollow  $\gamma$ -Fe<sub>2</sub>O<sub>3</sub> @graphene dissolved in HCl.

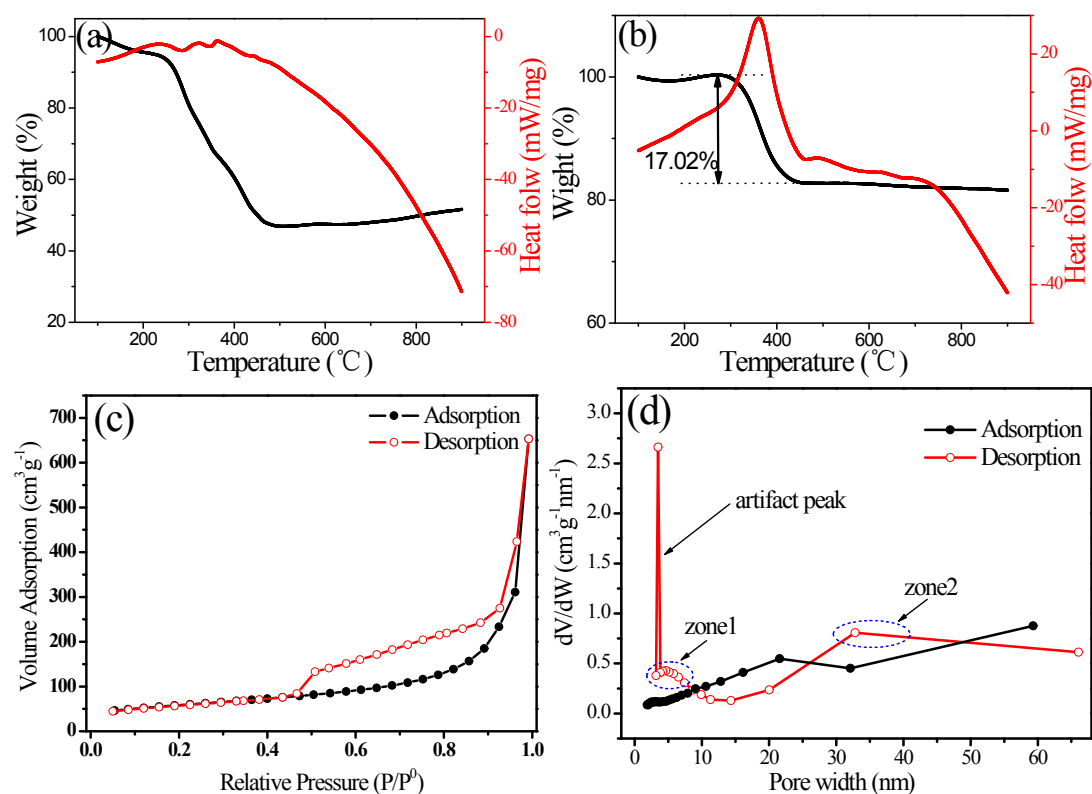

**Figure S3.** TGA and DTA curves of (a) PB in argon atmosphere and (b) nano-hollow  $\gamma$ -Fe<sub>2</sub>O<sub>3</sub>@graphene in oxygen atmosphere; (c) N<sub>2</sub>-adsorption/desorption isotherms for nano-hollow  $\gamma$ -Fe<sub>2</sub>O<sub>3</sub>@graphene; (d) the pore size distribution (PSD) of  $\gamma$ -Fe<sub>2</sub>O<sub>3</sub>@graphene depends on BJH method. The smaller pores, which are generated through the Kirkendall process, are distributed from 4-10 nm (peak around 5nm) marked as “zone 1” shown in the revised Fig. S3(d) as below. These pore sizes also match with TEM results shown in Fig. 1c.

The sharp peak in the PSD from the desorption branch is an artefact due to the intrinsic capillary evaporation of liquid nitrogen<sup>2</sup>. Another pore size (marked as “zone2 in Fig. S3d) is around 30nm ~ 40nm, which is generated by the packing pores of the core-shell  $\gamma$ -Fe<sub>2</sub>O<sub>3</sub>@graphene particles. From (c) and (d), it is clearly shown that the hybrid is a porous material with inhomogeneous nanoscale nanoporous and mesoporous.

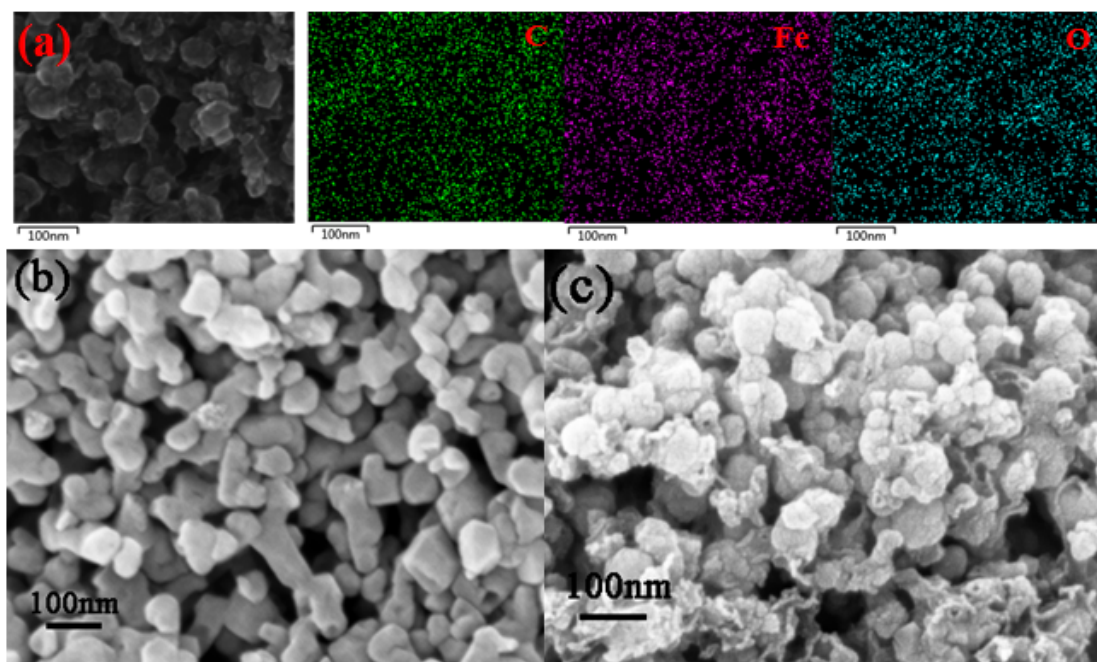

**Figure S4.** (a) The element mapping of nano-hollow  $\gamma\text{-Fe}_2\text{O}_3@\text{graphene}$ . SEM images of (b) Prussian Blue and (c) nano-hollow  $\gamma\text{-Fe}_2\text{O}_3@\text{graphene}$ .

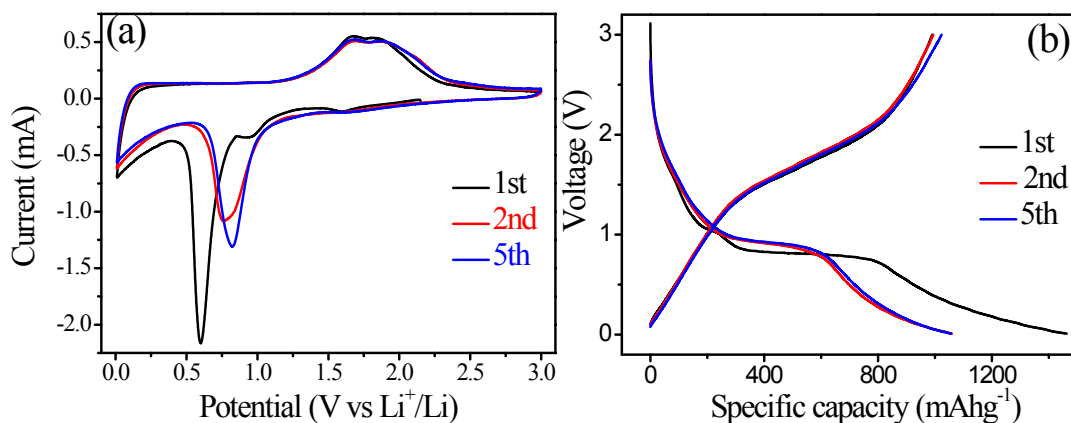

**Figure S5.** Electrochemical characterization of the prepared nano-hollow  $\gamma\text{-Fe}_2\text{O}_3\text{@graphene}$ :

(a) cyclic voltammetry tests of nano-hollow  $\gamma\text{-Fe}_2\text{O}_3\text{@graphene}$  at 0.1C in the potential range of 0.01V to 3.0V (vs.Li/Li<sup>+</sup>); (b) galvanostatic charge-discharge curves of nano-hollow  $\gamma\text{-Fe}_2\text{O}_3\text{@graphene}$  at 0.1C for the first 5 times.

Three obvious plateaus can be observed in the first discharge curve in Fig. S5b, which agree well with the three peaks in CV results for the first cycle. The following sloping region can be described as the formation of polymeric SEI layers. The first cycle discharge and charge capacities of nano-hollow  $\gamma\text{-Fe}_2\text{O}_3\text{@graphene}$  electrode at 0.1 C (1 C = 1000 mAhg<sup>-1</sup>) are 1462.32 and 990.45 mAh g<sup>-1</sup>, respectively, corresponding to a coulombic efficiency of 67.73%, which can also be explained by the irreversible formation of the SEI layers on the surface of nano-hollow  $\gamma\text{-Fe}_2\text{O}_3\text{@graphene}$  particles.

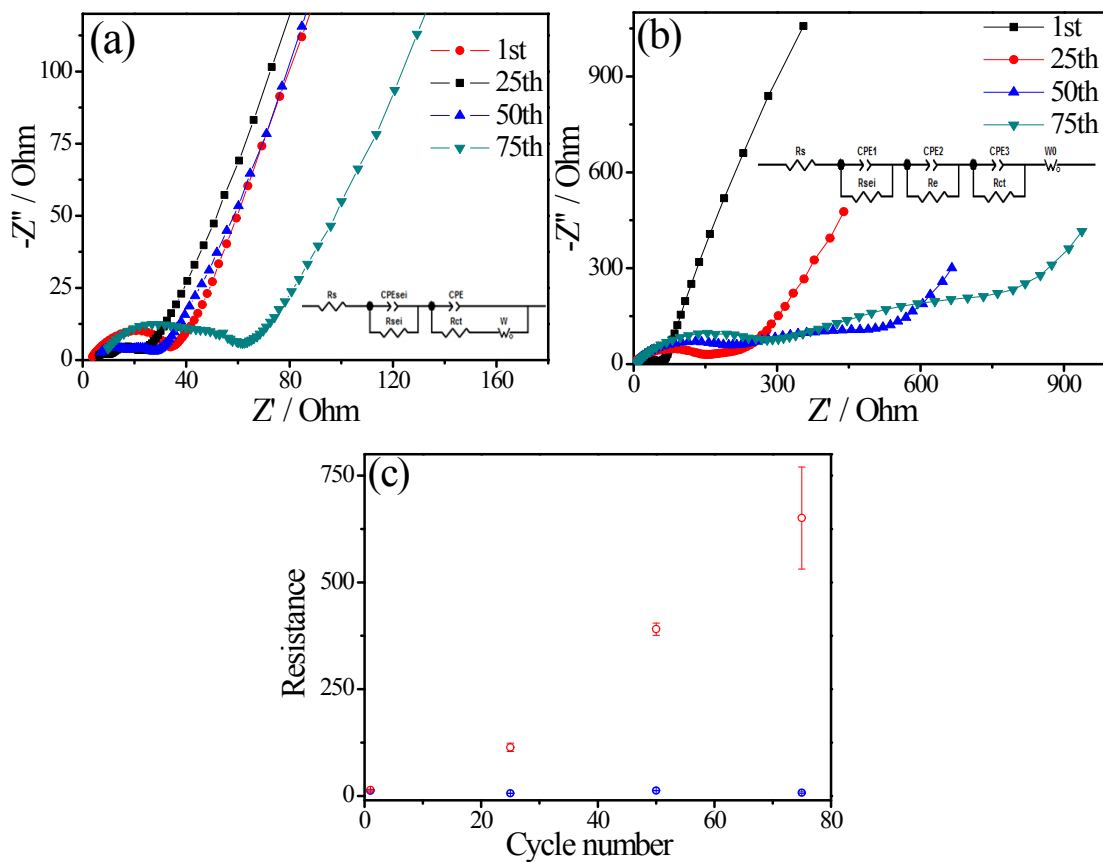

**Figure S6.** EIS data and equivalent circuit of (a) nano-hollow  $\gamma\text{-Fe}_2\text{O}_3$ @graphene and (b)  $\alpha\text{-Fe}_2\text{O}_3$ ; (c) charge transfer resistances and their errors calculated from impedance fitting of nano-hollow  $\gamma\text{-Fe}_2\text{O}_3$ @graphene (blue) and  $\alpha\text{-Fe}_2\text{O}_3$  (red).

Electrochemical impedance spectroscopy (EIS) measurements were performed after 1, 25, 50, and 75 charge/discharged cycles at 0.5 C for both nano-hollow  $\gamma\text{-Fe}_2\text{O}_3$ @graphene and  $\alpha\text{-Fe}_2\text{O}_3$  (Fig. S6). For nano-hollow  $\gamma\text{-Fe}_2\text{O}_3$ @graphene, the visible semicircles in the high and middle frequency ranges reflect the SEI ( $R_{SEI}$ ) and charge transfer ( $R_{ct}$ ) resistances, respectively.<sup>3</sup> But for  $\alpha\text{-Fe}_2\text{O}_3$ , three semicircles are needed to describe the resistances sufficiently, representing the resistance of SEI, electron, and charge transfer, respectively. Fig. S6c shows the  $R_{ct}$  for the two materials from impedance fitting. The values of  $R_{ct}$  for both

materials become larger with the increasing number of cycles. It is also noticeable that the charge transfer resistances for nano-hollow  $\gamma$ -Fe<sub>2</sub>O<sub>3</sub>@graphene are much smaller and increase much slower with the increasing cycles number than those for  $\alpha$ -Fe<sub>2</sub>O<sub>3</sub>, indicating a higher electrical conductivity induced by the graphene shells.

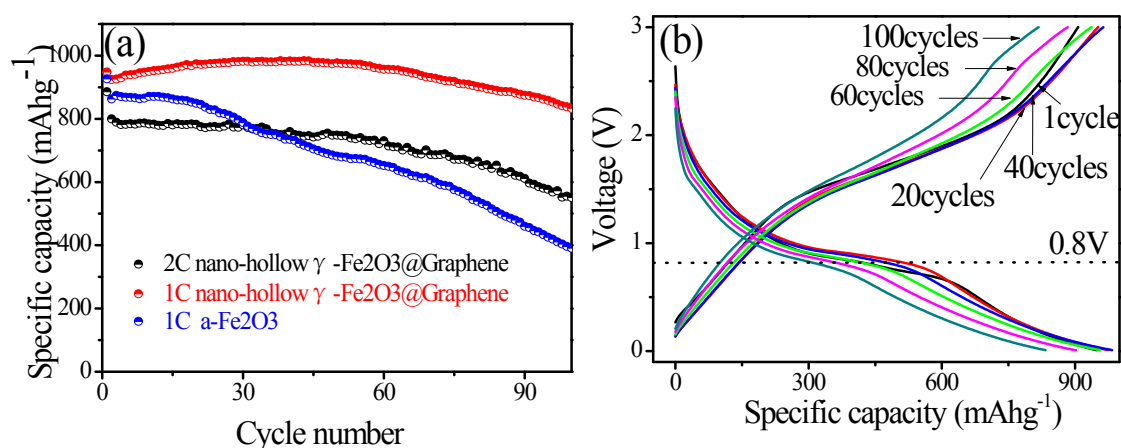

**Figure S7.** (a) Cycling performances of nano-hollow  $\gamma$ -Fe<sub>2</sub>O<sub>3</sub>@graphene at 1C and 2C and  $\alpha$ -Fe<sub>2</sub>O<sub>3</sub> at 1C; (b) the charge-discharge curves of nano-hollow  $\gamma$ -Fe<sub>2</sub>O<sub>3</sub>@graphene at 1C for 100 cycles.

The much better cycling stability of the nano-hollow  $\gamma$ -Fe<sub>2</sub>O<sub>3</sub>@graphene can be attributed to the structural stability of  $\gamma$ -Fe<sub>2</sub>O<sub>3</sub> (the (400) peak still exists during the charge and discharge process) and the nano-hollow structure with graphene shells, which buffer the volume expansion during electrochemical cycles. While the structure of  $\alpha$ -Fe<sub>2</sub>O<sub>3</sub> was damaged by the volume expansion during charge and discharge cycles, due to the absence of hollow structures and the relatively low structure stability of  $\alpha$ -Fe<sub>2</sub>O<sub>3</sub> during electrochemical cycles.

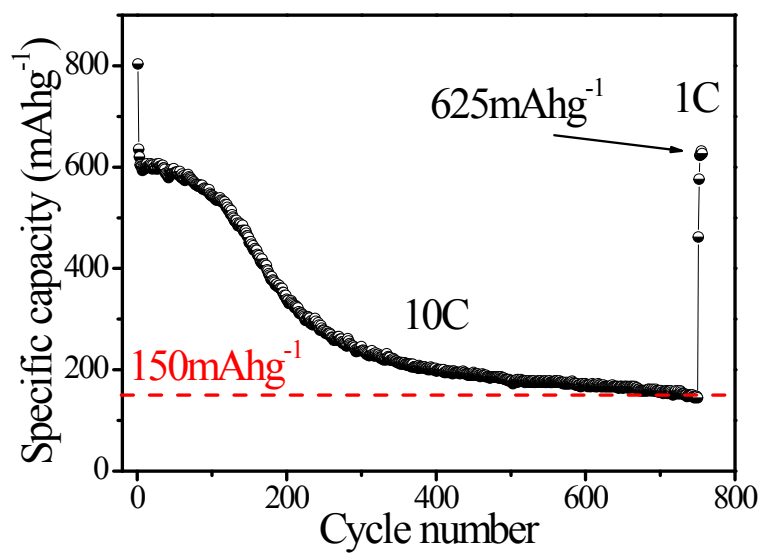

**Figure S8.** Galvanostatic charge-discharge curves of nano-hollow  $\gamma$ -Fe<sub>2</sub>O<sub>3</sub>@graphene at 10C for 750 cycles and 1C for 6 cycles. The dramatic drop after 100 cycles may be due to the significant increase of the electrical impedance.

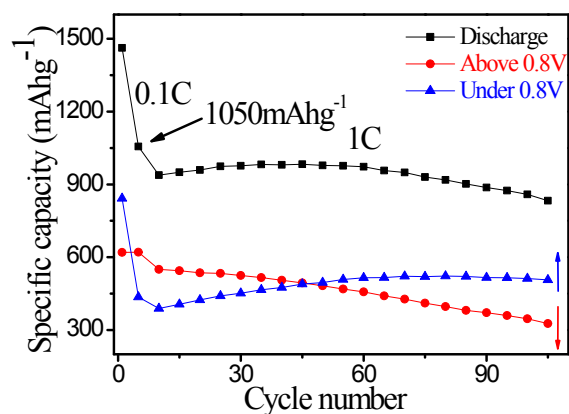

**Figure S9.** Schematic illustration of two parts of battery capacity of nano-hollow  $\gamma$ - $\text{Fe}_2\text{O}_3$ @graphene at 0.1C and 1C between 0.01v and 3V, red curve stands for the capacity above 0.8V, blue curve stands for the capacity under 0.8V.

**Table S1.** The performance comparison of iron-based materials for lithium-ion batteries.

| Ref. | Material                                                     | Morphology                                             | Specific capacity                                                                     | Rate-capacity               |
|------|--------------------------------------------------------------|--------------------------------------------------------|---------------------------------------------------------------------------------------|-----------------------------|
| 4    | Fe <sub>2</sub> O <sub>3</sub> /carbon                       | $\alpha$ -Fe <sub>2</sub> O <sub>3</sub> nanorods/CNFs | 1C/446mAhg <sup>-1</sup> and 2C/317 mAhg <sup>-1</sup> for 30cycles                   |                             |
| 5    | Fe <sub>2</sub> O <sub>3</sub> -graphite                     | Nano-particle                                          | 0.1C/491mAhg <sup>-1</sup> for 55cycles                                               | 1C/295 mAhg <sup>-1</sup>   |
| 6    | Fe <sub>2</sub> O <sub>3</sub>                               | Nano-composites                                        | 125mA g <sup>-1</sup> /470 and 419mAhg <sup>-1</sup> at80 and 200cycles               |                             |
| 7    | $\alpha$ -Fe <sub>2</sub> O <sub>3</sub> @C                  | Core-shell nanotubes                                   | 1C/1012-4C/482mAhg <sup>-1</sup> for 300 and 1000cycles                               | 4C/703 mAhg <sup>-1</sup>   |
| 8    | Fe <sub>2</sub> O <sub>3</sub> /CA                           | Nanoparticles                                          | 0.1C/617mAhg <sup>-1</sup> for 100cycles                                              | 0.8C/546 mAhg <sup>-1</sup> |
| 9    | Fe <sub>2</sub> O <sub>3</sub> @C/GNs                        | Submicro-particles                                     | 0.2C/900mAhg <sup>-1</sup> for 50cycles                                               |                             |
| 10   | $\alpha$ -Fe <sub>2</sub> O <sub>3</sub> /VC (vulcan carbon) | Nanoparticles                                          | 0.1C/825mAhg <sup>-1</sup> for 100cycles                                              | 1C/635 mAhg <sup>-1</sup>   |
| 11   | Ferrite/carbon hybrid                                        | Nanosheets                                             | 0.1C/600mAhg <sup>-1</sup> for 50cycles                                               |                             |
| 12   | $\alpha$ -Fe <sub>2</sub> O <sub>3</sub> /C                  | Pseudocubic                                            | 0.2C/688mAhg <sup>-1</sup> for 50cycles                                               |                             |
| 13   | $\gamma$ -Fe <sub>2</sub> O <sub>3</sub> @CNFs               | Nanoparticles                                          | 0.05C/830mAhg <sup>-1</sup> for 40cycles                                              | 5C/336 mAhg <sup>-1</sup>   |
| 14   | $\gamma$ -Fe <sub>2</sub> O <sub>3</sub> @GNS                | Nano-particle                                          | 0.1C/500mAhg <sup>-1</sup> and 1C/200mAhg <sup>-1</sup> for 100cycles                 |                             |
| 15   | Fe <sub>2</sub> O <sub>3</sub> @CNTS                         | Nanobelts                                              | 0.1C/865.9 mAhg <sup>-1</sup> for 50cycles                                            | 4C/442 mAhg <sup>-1</sup>   |
| 16   | CNT-encapsulated Fe <sub>2</sub> O <sub>3</sub>              | Nanoparticles                                          | 35 mA g <sup>-1</sup> /811.4mAhg <sup>-1</sup> for 100cycles                          | 1.2C/332 mAhg <sup>-1</sup> |
| 17   | Fe <sub>2</sub> O <sub>3</sub> /CNFs                         | Nanorod                                                | 0.2C/758mAhg <sup>-1</sup> for 50cycles                                               | 10C/245 mAhg <sup>-1</sup>  |
| 18   | $\alpha$ -Fe <sub>2</sub> O <sub>3</sub> -carbon nanofibe    | Nanoparticles                                          | 0.05C/604mAhg <sup>-1</sup> for 100cycles                                             |                             |
| 19   | Fe <sub>2</sub> O <sub>3</sub> on graphene                   | Nanocrystals                                           | 0.2C/1049mAhg <sup>-1</sup> for 450cycles                                             | 2C/634 mAhg <sup>-1</sup>   |
| 20   | Fe <sub>2</sub> O <sub>3</sub> on graphene                   | Nanorods                                               | 2C/508mAhg <sup>-1</sup> for 200cycles                                                |                             |
| 21   | Fe <sub>2</sub> O <sub>3</sub> /graphene                     | Sheet-on-sheet sandwich-like                           | 1C/662.4mAhg <sup>-1</sup> for 100cycles and 2C/456.2mAhg <sup>-1</sup> for 100cycles |                             |
| 22   | Fe <sub>2</sub> O <sub>3</sub> /graphene                     | Nanorod-like                                           | 0.1C/602.2mAhg <sup>-1</sup> for 30cycles                                             | 1C/210.7 mAhg <sup>-1</sup> |
| 23   | Fe <sub>2</sub> O <sub>3</sub> /Graphene                     | Particles                                              | 0.05C/1092mAhg <sup>-1</sup> for 50cycles                                             | 1C/501 mAhg <sup>-1</sup>   |
| 24   | Fe <sub>2</sub> O <sub>3</sub> /graphene                     | Particles                                              | 0.05C/1069mAhg <sup>-1</sup> for 50cycles                                             | 1C/543 mAhg <sup>-1</sup>   |
| 25   | Graphene/ Fe <sub>2</sub> O <sub>3</sub> /SnO <sub>2</sub>   | Nanoparticles                                          | 0.4C/700mAhg <sup>-1</sup> for 100cycles                                              | 10C/139 mAhg <sup>-1</sup>  |

|                 |                                                                                 |               |                                                                                        |                                |
|-----------------|---------------------------------------------------------------------------------|---------------|----------------------------------------------------------------------------------------|--------------------------------|
| 26              | $\alpha$ - Fe <sub>2</sub> O <sub>3</sub> /RGO                                  | Nanoparticles | 0.1C/950mAhg <sup>-1</sup> for 70cycles                                                | 0.8C/700<br>mAhg <sup>-1</sup> |
| 27              | Iron-oxide/graphene                                                             | Nanoparticles | 0.1C/900mAhg <sup>-1</sup> for 50cycles                                                | 5C/500<br>mAhg <sup>-1</sup>   |
| 28              | 40wt%RGO/ $\gamma$ - Fe <sub>2</sub> O <sub>3</sub>                             | Nanoparticles | 0.5C/690mAhg <sup>-1</sup> for 100cycles                                               | 10C/280<br>mAhg <sup>-1</sup>  |
| 29              | Fe <sub>2</sub> O <sub>3</sub> -graphene<br>hybrid                              | Nanoparticles | 0.05C/1000+/-50mAhg <sup>-1</sup> for 100cycles                                        | 2.5C/171<br>mAhg <sup>-1</sup> |
| 30              | $\alpha$ -Fe <sub>2</sub> O <sub>3</sub> /graphene                              | Nanoparticles | 0.1C/742mAhg <sup>-1</sup> for 50cycles                                                |                                |
| 31              | RGO- Fe <sub>2</sub> O <sub>3</sub>                                             | Nanospindles  | 0.1C/969mAhg <sup>-1</sup> for 100cycles and<br>5C/336mAhg <sup>-1</sup> for 100cycles |                                |
| 32              | Fe <sub>2</sub> O <sub>3</sub> /graphene                                        | Microspheres  | 160 mA g <sup>-1</sup> /660mAhg <sup>-1</sup> for 100cycles                            | 2.4C/332<br>mAhg <sup>-1</sup> |
| Current<br>work | Core-shell<br>Nanohollow<br>$\gamma$ - Fe <sub>2</sub> O <sub>3</sub> @Graphene | Nanoparticles | 1C/833mAhg <sup>-1</sup> for 100cycles ; 2C/551<br>mAhg <sup>-1</sup> for 100cycles    | 10C/504<br>mAhg <sup>-1</sup>  |

## References

- 1 N. Cabrera, *Philosophical Magazine*, 1949, **40**, 175.
- 2(a) J. C. Groen, L. A. A. Peffer and J. Pérez-Ramírez, *Microporous and Mesoporous Materials*, 2003, **60**, 1; (b) K. S. W. Sing, *Pure and Applied Chemistry*, 1985, **57**, 603.
- 3(a) L. A. Riley, S. Van Atta, A. S. Cavanagh, Y. Yan, S. M. George, P. Liu, A. C. Dillon and S.-H. Lee, *Journal of Power Sources*, 2011, **196**, 3317; (b) C. Wu, H. Zhang, Y. X. Wu, Q. C. Zhuang, L. L. Tian and X. X. Zhang, *Electrochimica Acta*, 2014, **134**, 18.
- 4 C. Wu, X. Li, W. Li, B. Li, Y. Wang, Y. Wang, M. Xu and L. Xing, *Journal of Power Sources*, 2014, **251**, 85.
- 5 Y. Wang, L. Yang, R. Hu, L. Ouyang and M. Zhu, *Electrochimica Acta*, 2014, **125**, 421.
- 6 P. Li, J. Deng, Y. Li, W. Liang, K. Wang, L. Kang, S. Zeng, S. Yin, Z. Zhao, X. Liu, Y. Yang and F. Gao, *Journal of Alloys and Compounds*, 2014, **590**, 318.
- 7 X. Gu, L. Chen, S. Liu, H. Xu, J. Yang and Y. Qian, *Journal of Materials Chemistry A*, 2014, **2**, 3439.
- 8 N. Liu, J. Shen and D. Liu, *Electrochimica Acta*, 2013, **97**, 271.
- 9 G. Wang, H. Wang, S. Cai, J. Bai, Z. Ren and J. Bai, *Journal of Power Sources*, 2013, **239**, 37.
- 10 N. K. Chaudhari, M. S. Kim, T. S. Bae and J. S. Yu, *Electrochimica Acta*, 2013, **114**, 60.
- 11 B. Jang, M. Park, O. B. Chae, S. Park, Y. Kim, S. M. Oh, Y. Piao and T. Hyeon, *Journal of the American Chemical Society*, 2012, **134**, 15010.
- 12 F. Cheng, K. Huang, S. Liu, J. Liu and R. Deng, *Electrochimica Acta*, 2011, **56**, 5593.
- 13 Y. Wu, P. Zhu, M. V. Reddy, B. V. Chowdari and S. Ramakrishna, *ACS Appl Mater Interfaces*, 2014, **6**, 1951.
- 14 O. Vargas, Á. Caballero and J. Morales, *Electrochimica Acta*, 2014, **130**, 551.
- 15 M. Wu, J. Chen, C. Wang, F. Wang, B. Yi, W. Su, Z. Wei and S. Liu, *Electrochimica Acta*, 2014, **132**, 533.
- 16 W. J. Yu, P. X. Hou, F. Li and C. Liu, *Journal of Materials Chemistry*, 2012, **22**, 13756.
- 17 Z. Liu and S. W. Tay, *Materials Letters*, 2012, **72**, 74.
- 18 L. Ji, O. Toprakci, M. Alcoutlabi, Y. Yao, Y. Li, S. Zhang, B. Guo, Z. Lin and X. Zhang, *ACS Appl Mater Interfaces*, 2012, **4**, 2672.
- 19 H. Zhang, L. Zhou and C. Yu, *RSC Advances*, 2014, **4**, 495.
- 20 T. Hu, M. Xie, J. Zhong, H. T. Sun, X. Sun, S. Scott, S. M. George, C. S. Liu and J. Lian, *Carbon*, 2014, **76**, 141.
- 21 J. Kan and Y. Wang, *Scientific reports*, 2013, **3**, 3502.
- 22 B. Zhao, R. Liu, X. Cai, Z. Jiao, M. Wu, X. Ling, B. Lu and Y. Jiang, *Journal of Applied Electrochemistry*, 2013, **44**, 53.
- 23 W. Xiao, Z. Wang, H. Guo, Y. Zhang, Q. Zhang and L. Gan, *Journal of Alloys and Compounds*, 2013, **560**, 208.
- 24 W. Xiao, Z. Wang, H. Guo, X. Li, J. Wang, S. Huang and L. Gan, *Applied Surface Science*, 2013, **266**, 148.
- 25 G. Xia, N. Li, D. Li, R. Liu, C. Wang, Q. Li, X. Lu, J. S. Spendelow, J. Zhang and G. Wu, *ACS Appl Mater Interfaces*, 2013, **5**, 8607.
- 26 M. Du, C. Xu, J. Sun and L. Gao, *Journal of Materials Chemistry A*, 2013, **1**, 7154.
- 27 B. Jang, O. B. Chae, S. K. Park, J. Ha, S. M. Oh, H. B. Na and Y. Piao, *Journal of Materials*

- Chemistry A*, 2013, **1**, 15442.
- 28 I. T. Kim, A. Magasinski, K. Jacob, G. Yushin and R. Tannenbaum, *Carbon*, 2013, **52**, 56.
- 29 L. Tian, Q. Zhuang, J. Li, C. Wu, Y. Shi and S. Sun, *Electrochimica Acta*, 2012, **65**, 153.
- 30 D. Chen, W. Wei, R. Wang, J. Zhu and L. Guo, *New Journal of Chemistry*, 2012, **36**, 1589.
- 31 S. Bai, S. Chen, X. Shen, G. Zhu and G. Wang, *RSC Advances*, 2012, **2**, 10977.
- 32 G. Wang, T. Liu, Y. Luo, Y. Zhao, Z. Ren, J. Bai and H. Wang, *Journal of Alloys and Compounds*, 2011, **509**, L216.
